# Supplementary material
Source: PubMed Central journal article supplement (PMC2879130)

1A

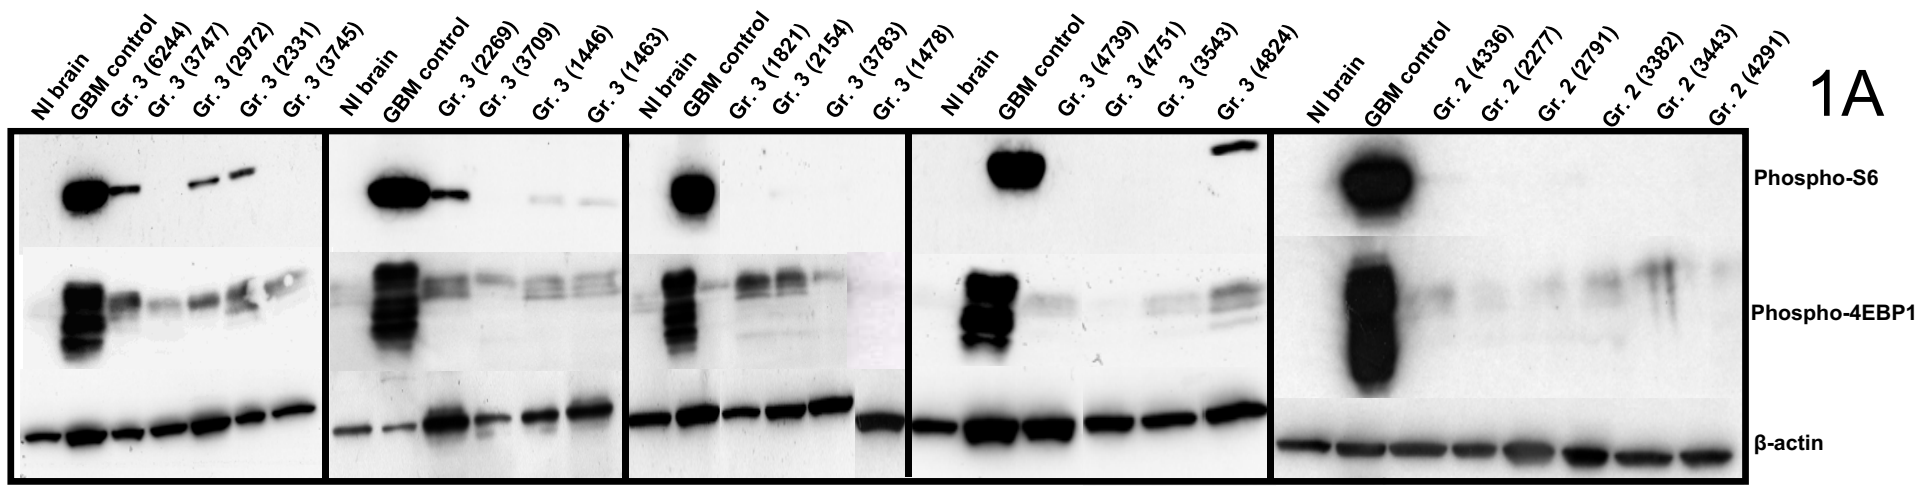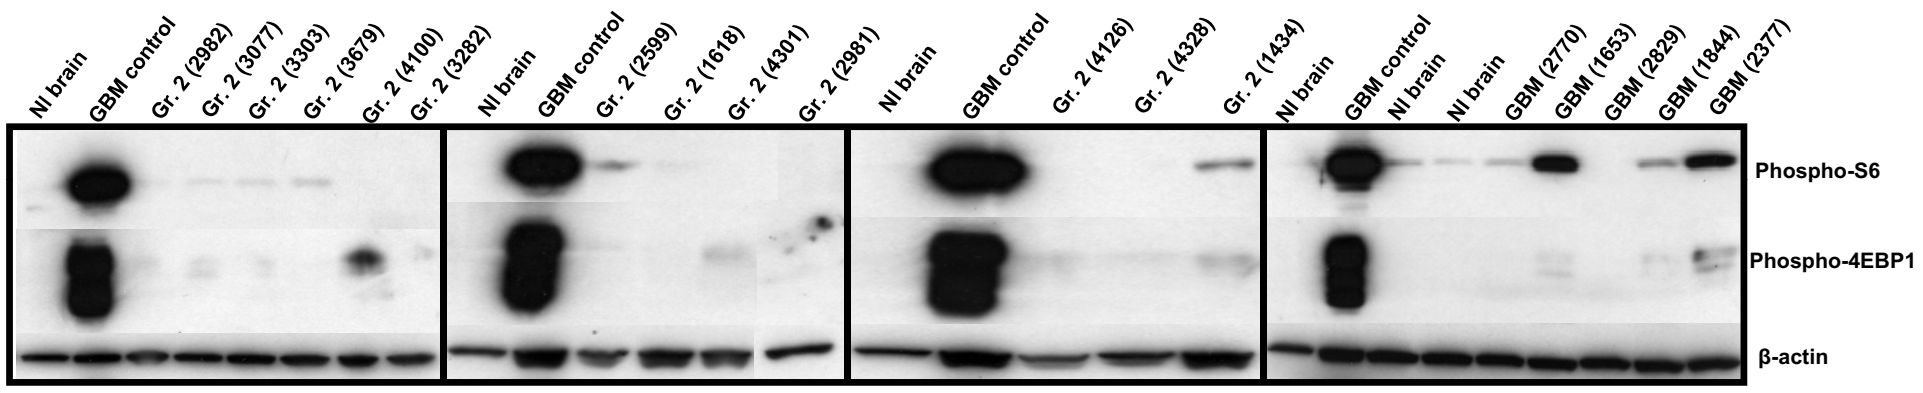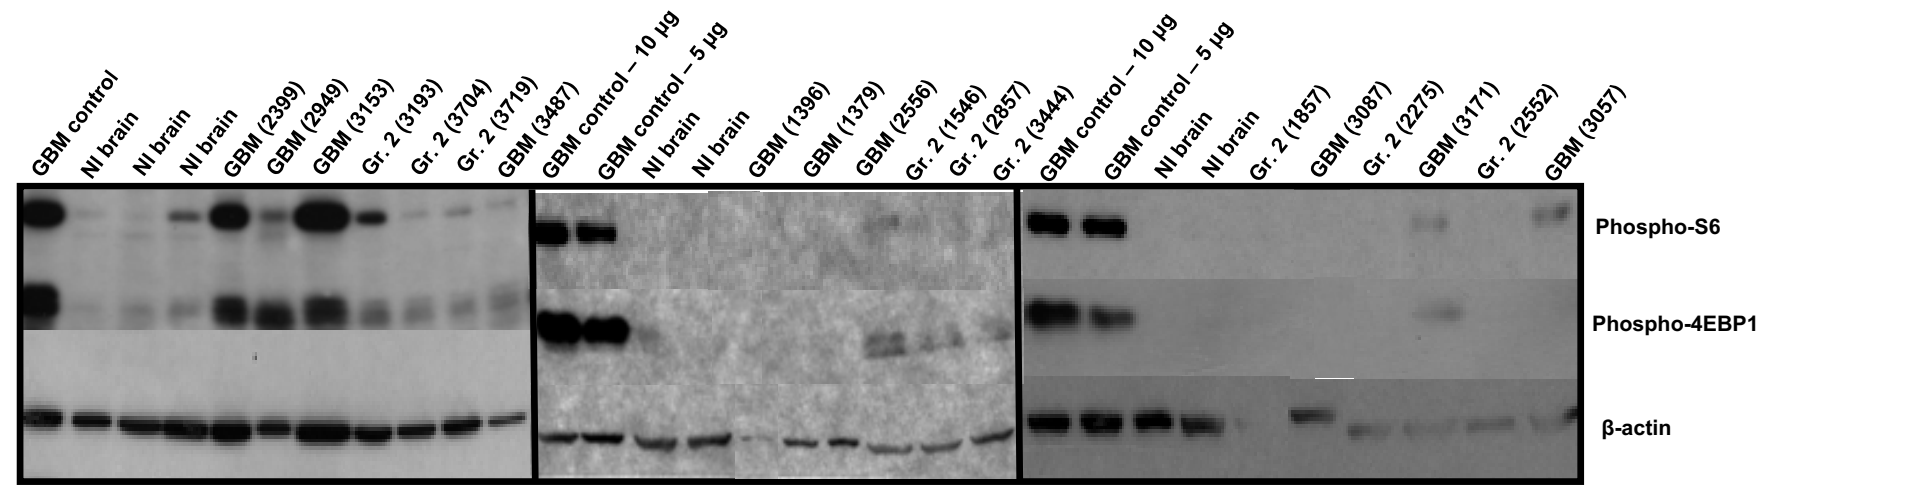

1B

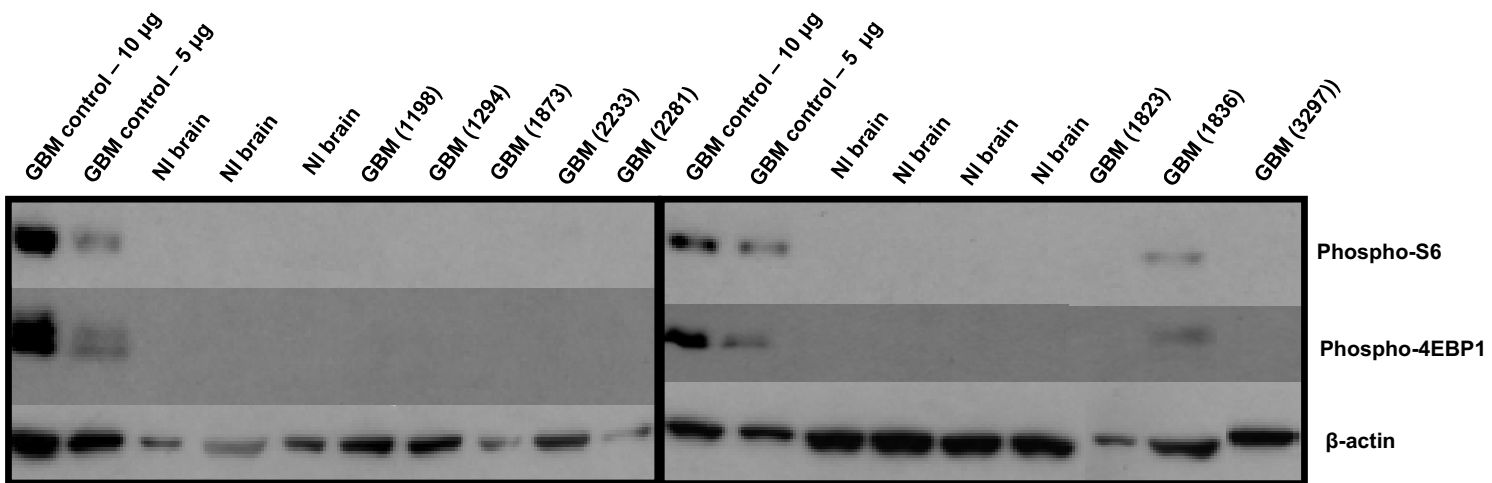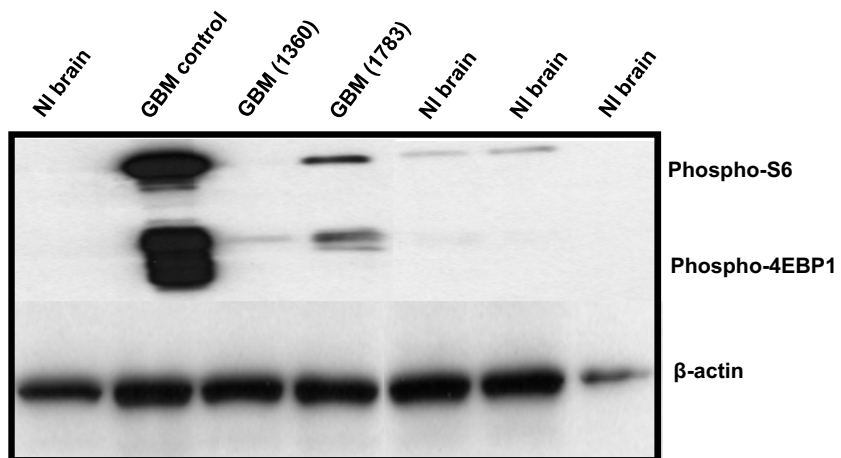

Supplement: NIHMS201149-supplement-Supplemental_Figure.pdf [file NIHMS201149-supplement-Supplemental_Figure.pdf]
